# Supplementary material for: Epidemiology of Non-O157 Shiga Toxin-Producing Escherichia coli in the Province of Alberta, Canada, from 2018 to 2021
Source: MDPI journal article supplement (doi:10.3390/microorganisms10040814), 2022-04-14
Supplement: s1 [file s1]

**Supplementary Table S1.** Full List of non-O157 STEC serogroups isolated during the study period

| Serogroup      | Number of Isolates | Serogroup    | Number of Isolates |
|----------------|--------------------|--------------|--------------------|
| O26            | 221                | O8           | 1                  |
| O103           | 116                | O11          | 1                  |
| O111           | 93                 | O16          | 1                  |
| O121           | 80                 | O19          | 1                  |
| O118           | 24                 | O27          | 1                  |
| O71            | 21                 | O28          | 1                  |
| O5             | 20                 | O41          | 1                  |
| O Undetermined | 19                 | O48          | 1                  |
| O145           | 16                 | O59          | 1                  |
| O69            | 15                 | O77          | 1                  |
| O186           | 14                 | O80          | 1                  |
| O Rough        | 13                 | O86          | 1                  |
| O84            | 12                 | O100         | 1                  |
| Unknown        | 7                  | O108         | 1                  |
| O146           | 5                  | O115         | 1                  |
| O85            | 4                  | O119         | 1                  |
| O91            | 3                  | O128         | 1                  |
| O175           | 3                  | O136         | 1                  |
| O177           | 3                  | O142         | 1                  |
| O38            | 2                  | O156         | 1                  |
| O98            | 2                  | O170         | 1                  |
| O109           | 2                  | O172         | 1                  |
| O113           | 2                  | O174         | 1                  |
| O168           | 2                  | O178         | 1                  |
| O182           | 2                  | O181         | 1                  |
| O1             | 1                  | O183         | 1                  |
| O6             | 1                  |              |                    |
| Column Total   | 703                | Column Total | 26                 |
| <b>Total</b>   | <b>729</b>         |              |                    |
